# Supplementary material
Source: HighWire-hosted journal article supplement (https://jnm.snmjournals.org/highwire/filestream/110364/field_highwire_adjunct_files/0/264544_Supplemental_Data.pdf)
Supplement: 264544_Supplemental_Data.pdf [file 264544_Supplemental_Data.pdf]

## Radiochemical Processing

$^{18}\text{F}$ -FDG was synthesized in-house by a cyclotron (MINItrace, GE Healthcare) in accordance with the standard methods, using the coincidence  $^{18}\text{F}$ -FDG synthesis module (TracerLab FxFN, GE Healthcare) (16). The precursor FAP-2286 and FAPI-46 were obtained from Yantai Dongcheng Pharmaceutical Group Co., Ltd (Shandong, China) and Jiangsu Huayi Technology Co., Ltd. (Jiangsu, China), respectively. Both compounds were used for research purpose. Radiolabeling of  $^{68}\text{Ga}$ -FAPI-46 was performed according to previously described protocols (17).  $^{68}\text{Ga}^{3+}$  was eluted from  $^{68}\text{Ge}/^{68}\text{Ga}$  generator (ITG, Germany). The elution volume of  $^{68}\text{Ga}^{3+}$  (925-1110 MBq in 0.6M HCl, 4 ml) was added to a solution of FAPI-46 (25  $\mu\text{g}$  [28.2 nmol] in sodium acetate, 1mL). The reactor vial was heated to 100°C for 10 min. After trapping of on a solid-phase cartridge (Sep-Pak C18 Plus Light Cartridge, Waters, USA), the cartridge was washed with water (20mL). The elution of  $^{68}\text{Ga}$ -FAPI-46 was performed by using 75% ethanol (1.0 ml) and the final formulation of  $^{68}\text{Ga}$ -FAPI-46 was diluted with normal saline (14 mL). The radiolabeling of  $^{68}\text{Ga}$ -FAP-2286 was performed in a similar protocol, with a reaction mixture of 25  $\mu\text{g}$  (17.0 nmol) FAP-2286 and 925-1110 MBq  $^{68}\text{Ga}$  solution. Quality control of the radiosynthesis was performed by ultraviolet and radio-high performance liquid chromatography (HPLC). The radiochemical purity was over 95% for both  $^{68}\text{Ga}$ -FAP-2286 and  $^{68}\text{Ga}$ -FAPI-46, and the final product was diluted with saline and sterilised by passing through a 0.22- $\mu\text{m}$  Millipore filter into a sterile multidose syringe. The final product was sterile and pyrogen-free.

## PET/CT imaging and reconstruction

$^{18}\text{F}$ -FDG PET/CT was performed within 7 days of  $^{68}\text{Ga}$ -FAP-2286 PET/CT scan. Patients were instructed to fast for at least 6 h before  $^{18}\text{F}$ -FDG PET/CT scan and to drink 500 mL of water before the scan to stimulate  $^{18}\text{F}$ -FDG excretion from the renal calyces and subsequent voiding (18). A normal blood glucose level in the peripheral blood was ensured on  $^{18}\text{F}$ -FDG PET/CT imaging evaluation. In a certain group of patients,  $^{68}\text{Ga}$ -FAPI-46 PET/CT was performed within 7 days of  $^{68}\text{Ga}$ -FAP-2286 PET/CT for a direct comparison between the two FAPI derivatives. No specific preparation was required before  $^{68}\text{Ga}$ -FAPI-2286 and  $^{68}\text{Ga}$ -FAPI-46 PET/CT scans.

The injected activities for  $^{18}\text{F}$ -FDG were  $288.1 \pm 28.4$  MBq (range, 227.5-332.4),  $194.2 \pm 42.1$  MBq (range 141.8-264.5) for  $^{68}\text{Ga}$ -FAPI-46, and  $195.0 \pm 43.1$  MBq (range 143.7-272.4) for  $^{68}\text{Ga}$ -FAP-2286, respectively. Data were acquired using a hybrid PET/CT (Discovery MI, GE Healthcare) after 1 h of intravenous administration. A low-dose CT scan (100-120 keV; 80-120mA; slice thickness, 3 mm) was collected for attenuation correction and image fusion. All PET images were acquired in 3D mode and were reconstructed by the Bayesian penalized likelihood (BPL) reconstruction algorithm (Q.clear, GE Healthcare).

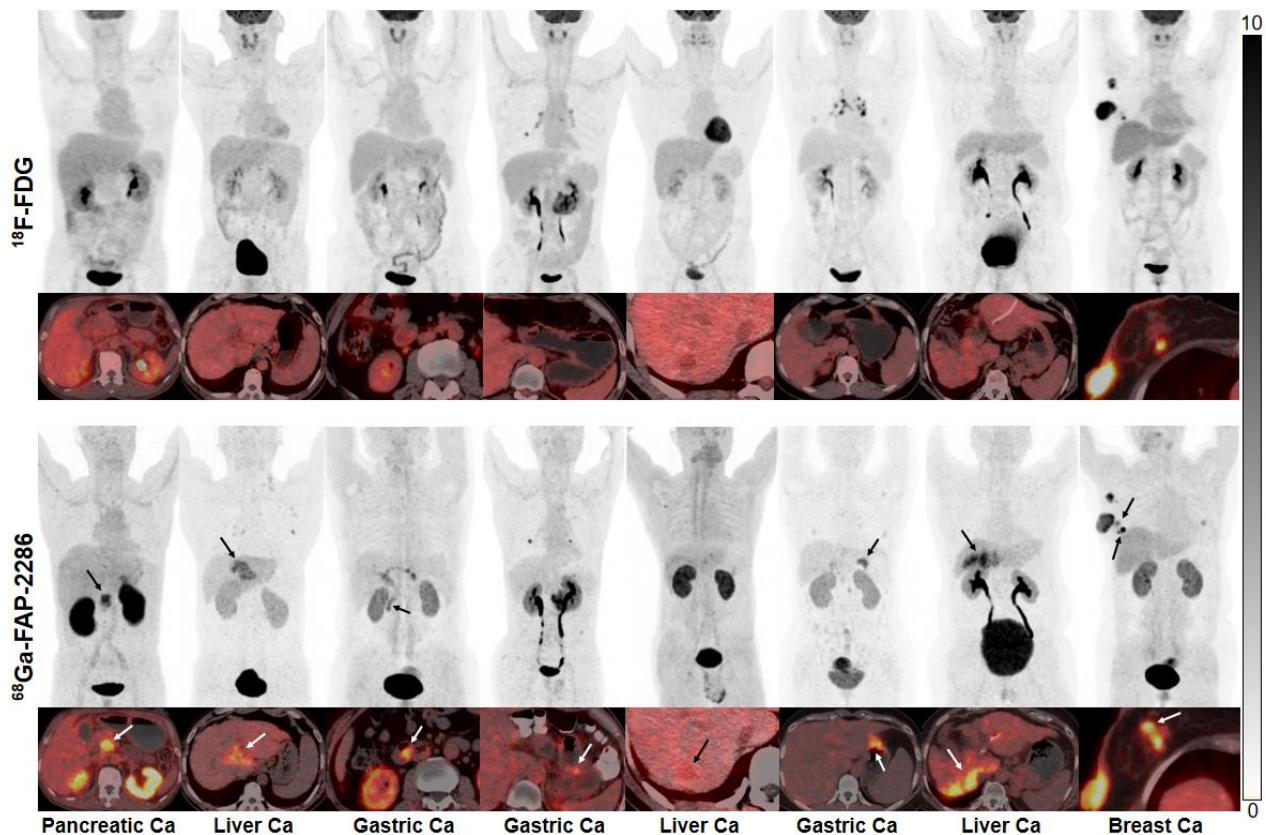

**Supplemental Fig. 1** Among the 44 patients underwent PET/CT for initial staging, nine primary tumor lesions from 8 patients were not visualized on  $^{18}\text{F}$ -FDG PET/CT, but were well visualized on  $^{68}\text{Ga}$ -FAP-2286 PET/CT. The specific tumor entities include gastric cancer (n=3), liver cancer (n=3), breast cancer (n=2), and pancreatic cancer (n=1).

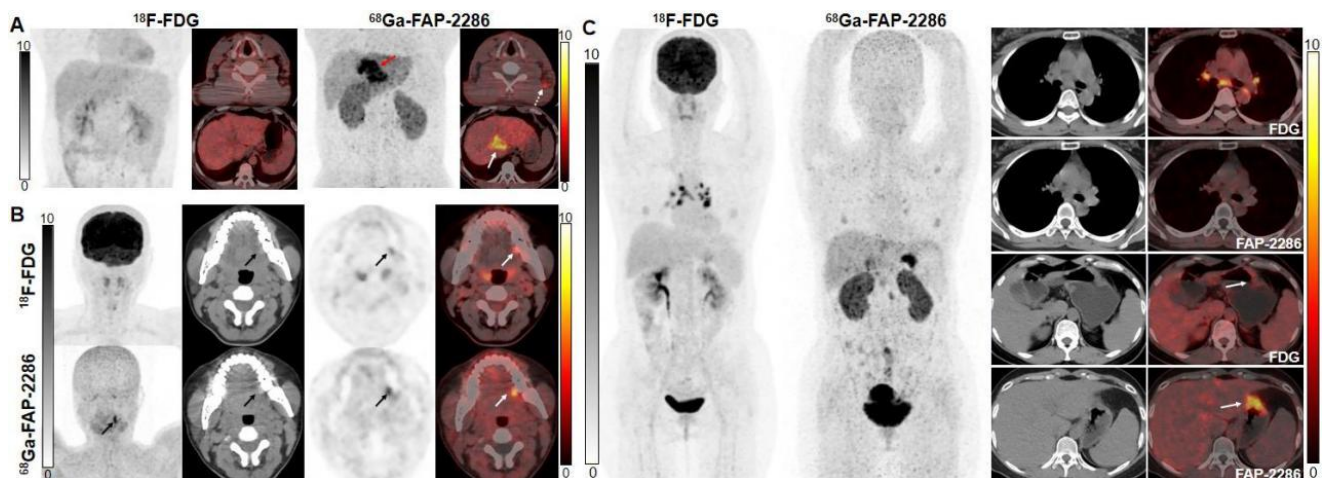

**Supplemental Fig. 2** Representative images of patients who underwent  $^{18}\text{F}$ -FDG and  $^{68}\text{Ga}$ -FAP-2286 PET/CT imaging. (A) A 47-year-old man with known hilar cholangiocarcinoma underwent PET/CT imaging for tumor staging.  $^{68}\text{Ga}$ -FAP-2286 demonstrated high tracer uptakes in the primary tumor (solid arrows) and metastatic cervical lymph nodes (confirmed via biopsy, dotted arrows), while  $^{18}\text{F}$ -FDG demonstrated no uptake. (B) A 47-year-old woman with tongue cancer who underwent surgical resection, underwent PET/CT imaging after 6 months for the detection of tumor recurrence. Compared to  $^{18}\text{F}$ -FDG,  $^{68}\text{Ga}$ -FAP-2286 demonstrated a higher tracer uptake in the recurrent tumor lesions (solid arrow). (C) A 40-year-old woman with known gastric signet ring cell carcinoma underwent PET/CT imaging for initial staging.  $^{68}\text{Ga}$ -FAP-2286 demonstrated a higher tracer uptake in the primary tumor than did  $^{18}\text{F}$ -FDG (solid arrows). Notably, high metabolic activity of the mediastinal lymph nodes was observed for  $^{18}\text{F}$ -FDG, while  $^{68}\text{Ga}$ -FAP-2286 demonstrated no abnormal activity. The patient subsequently underwent an endoscopic ultrasound fine-needle biopsy, and the pathological results revealed inflammatory lymph nodes.

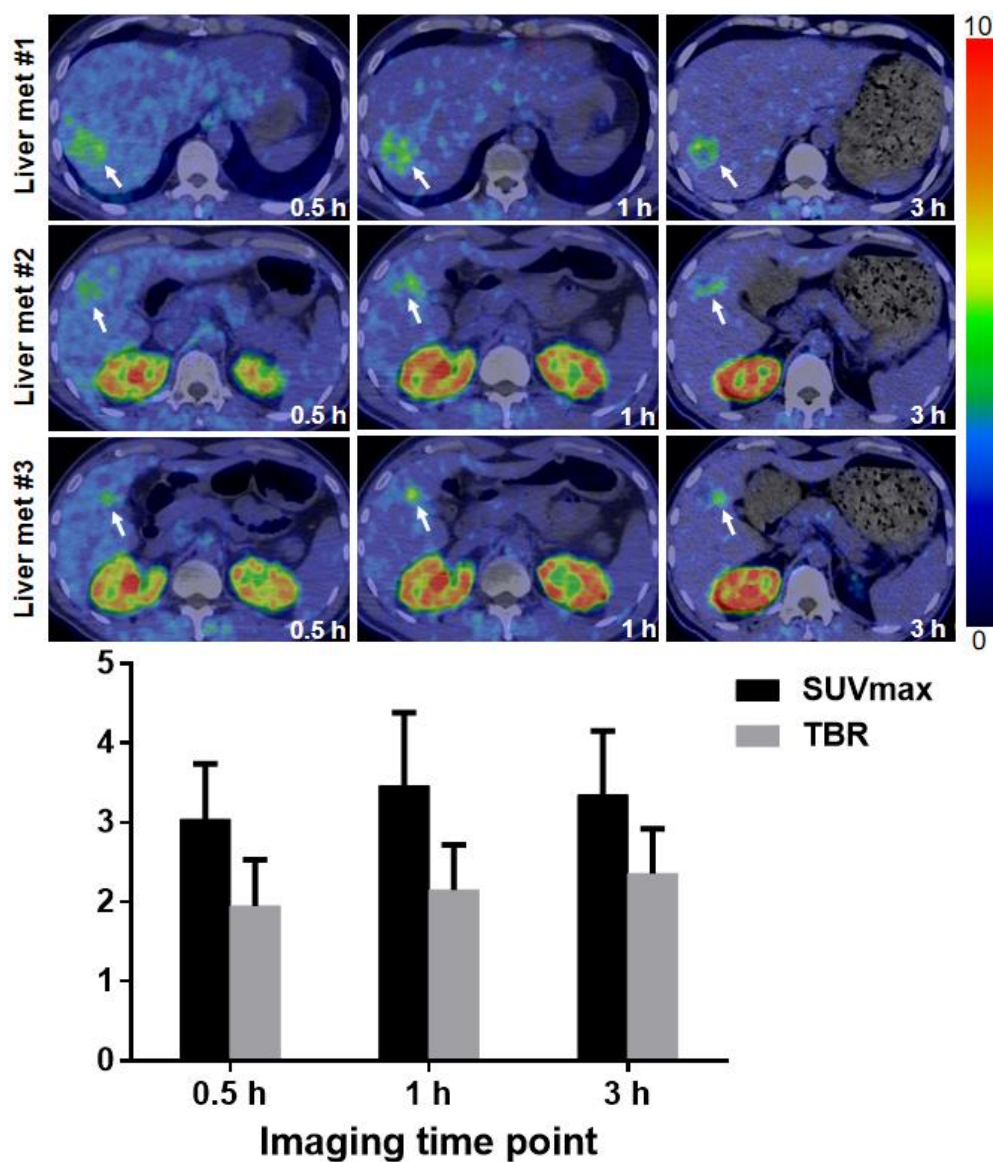

**Supplemental Fig. 3** A 40-year-old man with a history of radical resection for colon cancer underwent  $^{68}\text{Ga}$ -FAP-2286 PET/CT imaging at different time points after injection. Rapid and stable radiotracer uptake was observed in the liver metastases. Semiquantitative analysis of the liver metastases demonstrated a stable  $^{68}\text{Ga}$ -FAP-2286 uptake but an increase in TBR from 0.5 to 3 h.

Abbreviation: FAP = fibroblast activation protein; Met = metastasis; TBR = tumor-to-background ratio.

**Supplemental Table 1.** Comparison of  $^{18}\text{F}$ -FDG and  $^{68}\text{Ga}$ -FAP-2286 PET/CT-based TNM staging and recurrence detection in patients with additional findings

| Initial Staging      |                 |                            |                            |                                                         |          |                                                                                                                                    |
|----------------------|-----------------|----------------------------|----------------------------|---------------------------------------------------------|----------|------------------------------------------------------------------------------------------------------------------------------------|
| No.                  | Types of cancer | TNM Stage (FDG-based)      | TNM Stage (FAP-2286-based) | Additional finding on FAP-2286 PET/CT (compared to FDG) |          | Staging change (compared to FDG)                                                                                                   |
| Patient 2            | Pancreatic Ca   | IIA                        | IIA                        | Primary tumor detected                                  |          | None                                                                                                                               |
| Patient 9            | Liver Ca (ICC)  | IIIA                       | IIIA                       | Primary tumor detected                                  |          | None                                                                                                                               |
| Patient 12           | Ovarian Ca      | IVB                        | IVB                        | Larger disease extent of PM                             |          | None                                                                                                                               |
| Patient 13           | HNC (NPC)       | IVA                        | IVB                        | Bone mets                                               |          | Upstaged                                                                                                                           |
| Patient 19           | Gastric Ca      | IV                         | IV                         | Primary tumor detected                                  |          | None                                                                                                                               |
| Patient 21           | Pancreatic Ca   | IV                         | IV                         | More bone mets                                          |          | None                                                                                                                               |
| Patient 25           | Liver Ca (HCC)  | II                         | II                         | Primary tumor detected; More liver mets                 |          | None                                                                                                                               |
| Patient 27           | Pancreatic Ca   | III                        | III                        | More abdominal LN mets                                  |          | None                                                                                                                               |
| Patient 30           | Liver Ca (HCC)  | IVB                        | IVB                        | More abdominal LN mets and bone mets                    |          | None                                                                                                                               |
| Patient 31           | Pancreatic Ca   | IV                         | IV                         | Larger disease extent of PM                             |          | None                                                                                                                               |
| Patient 38           | Esophageal Ca   | IIIA                       | IIIB                       | Greater number of mediastinal LN mets                   |          | Upstaged                                                                                                                           |
| Patient 40           | Breast Ca       | IIIB                       | IIIB                       | More primary tumor detected                             |          | None                                                                                                                               |
| Patient 48           | Gastric Ca      | IIA                        | IIA                        | Primary tumor detected                                  |          | None                                                                                                                               |
| Patient 49           | Gastric Ca      | IIA                        | IIB                        | Primary tumor detected; More abdominal LN mets          |          | Upstaged                                                                                                                           |
| Patient 51           | Liver Ca (ICC)  | II                         | II                         | Primary tumor detected                                  |          | None                                                                                                                               |
| Patient 62           | Ovarian Ca      | IVB                        | IVB                        | Larger disease extent of PM                             |          | None                                                                                                                               |
| Patient 63           | HNC (NPC)       | IVB                        | IVB                        | More bone mets                                          |          | None                                                                                                                               |
| Patient 64           | Pancreatic Ca   | III                        | III                        | More abdominal LN mets                                  |          | None                                                                                                                               |
| Recurrence detection |                 |                            |                            |                                                         |          |                                                                                                                                    |
| No.                  | Types of cancer | Local recurrence detection |                            | Distant metastases detection                            |          | Additional finding on FAP-2286 PET/CT                                                                                              |
|                      |                 | FDG                        | FAP-2286                   | FDG                                                     | FAP-2286 |                                                                                                                                    |
| Patient 1            | Glioblastoma    | -                          | +                          | NA                                                      | NA       | Local recurrence detected by FAP-2286 PET/CT                                                                                       |
| Patient 11           | Gastric Ca      | NA                         | NA                         | -                                                       | +        | Abdominal LN mets detected by FAP-2286 PET/CT                                                                                      |
| Patient 22           | Liver Ca (ICC)  | -                          | +                          | +                                                       | +        | Local recurrence detected by FAP-2286 PET/CT; More abdominal LN mets, subcutaneous mets, and bone mets detected by FAP-2286 PET/CT |
| Patient 24           | Liver Ca (HCC)  | -                          | +                          | NA                                                      | NA       | Local recurrence detected by FAP-2286 PET/CT                                                                                       |
| Patient 28           | Rectal Ca       | NA                         | NA                         | +                                                       | +        | Larger disease extent of PM detected by FAP-2286 PET/CT                                                                            |
| Patient 34           | Liver Ca (HCC)  | NA                         | NA                         | -                                                       | +        | Liver mets detected by FAP-2286 PET/CT                                                                                             |
| Patient 36           | Gastric Ca      | NA                         | NA                         | +                                                       | +        | More bone mets and larger disease extent of PM detected by FAP-2286 PET/CT                                                         |
| Patient 43           | HNC (Tongue Ca) | -                          | +                          | NA                                                      | NA       | Local recurrence detected by FAP-2286 PET/CT                                                                                       |
| Patient 46           | Renal Ca        | NA                         | NA                         | +                                                       | +        | More bone mets detected by FAP-2286 PET/CT                                                                                         |
| Patient 57           | HNC (Tongue Ca) | +                          | +                          | -                                                       | +        | Muscle mets and liver mets detected by FAP-2286 PET/CT                                                                             |
| Patient 58           | HNC (Tongue Ca) | -                          | +                          | NA                                                      | NA       | Local recurrence detected by FAP-2286 PET/CT                                                                                       |
| Patient 59           | Liver Ca (HCC)  | -                          | +                          | NA                                                      | NA       | Local recurrence detected by FAP-2286 PET/CT                                                                                       |

Note. The clinical stage was assigned based on American Joint Committee on Cancer (AJCC) staging system (Eighth edition).

Abbreviations: Ca = cancer, ICC = intrahepatic cholangiocarcinoma, HNC = head and neck cancer, NPC = nasopharyngeal carcinoma, LN = lymph nodes, PM = peritoneal metastases, mets = metastases, HCC = hepatocellular carcinoma, NA = not applicable.
